# Supplementary material for: Arrested dynamics in a model peptide hydrogel system
Source: Royal Society of Chemistry journal article supplement (doi:10.1039/c9sm02244a), 2020-01-01
Supplement: c9sm02244a1.pdf [file c9sm02244a1.pdf]

Supplementary information

# Arrested dynamics in a model peptide hydrogel system

Axel Rüter<sup>a</sup>, Stefan Kuczera<sup>a</sup>, Luigi Gentile<sup>b</sup>, and Ulf Olsson<sup>a</sup>

<sup>a</sup>*Division of Physical Chemistry, Lund University, SE-22100 Lund, Sweden.*

<sup>b</sup>*Department of Chemistry, University of Bari Aldo Moro, I-70121, Italy.*

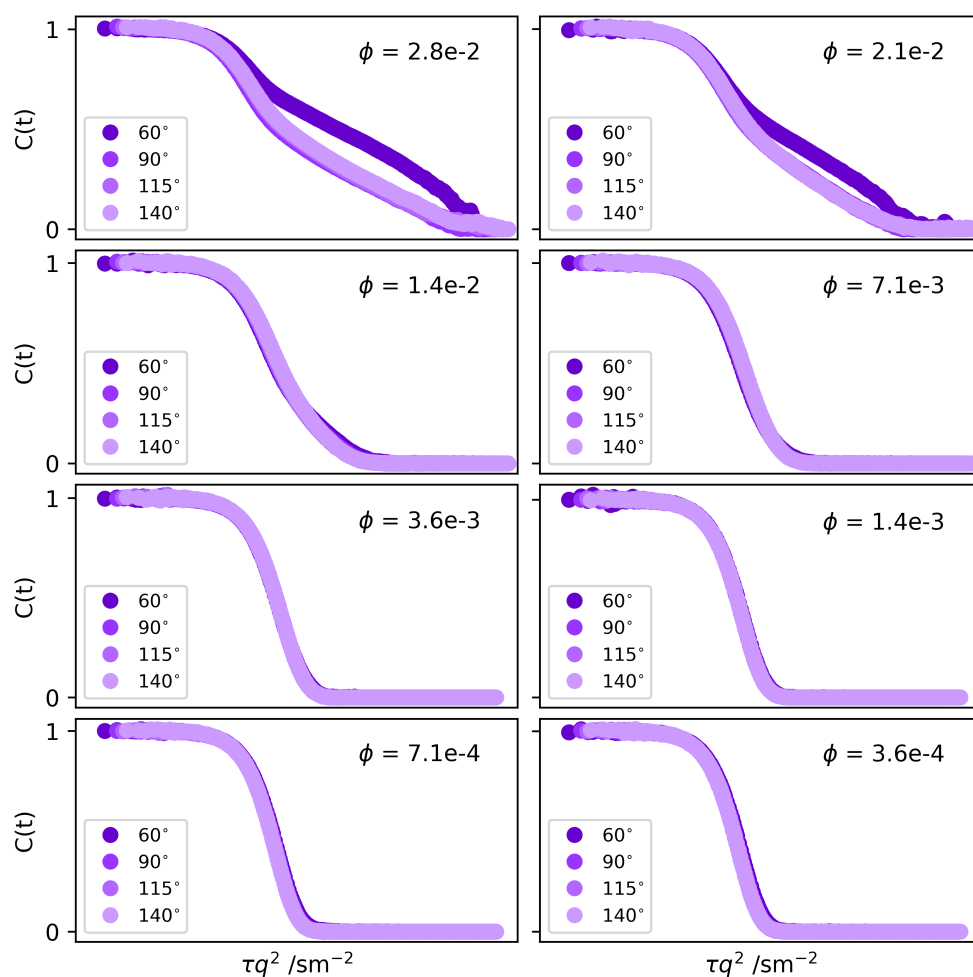

**Figure S1** Correlation functions for all 8 A<sub>10</sub>K samples at 4 different angles, where the lag time  $\tau$  is scaled by the square of the scattering vector,  $q^2$ .

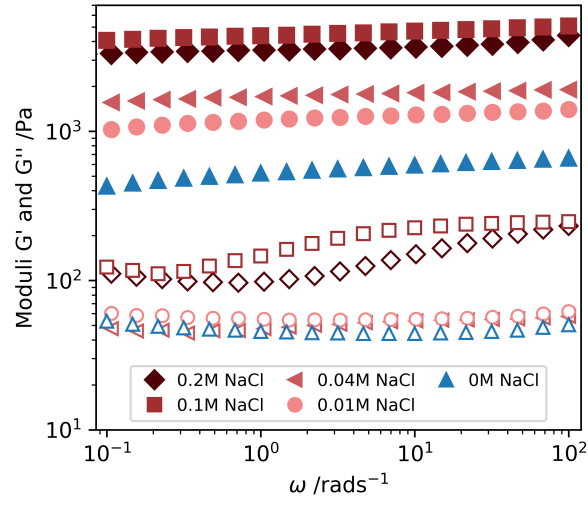

**Figure S2** Frequency sweeps of A<sub>10</sub>K samples at  $\phi = 0.025$  and varying salt concentration, with  $G'$  (solid) and  $G''$  (hollow). The measurements were obtained at a strain  $\gamma = 1\%$ .
